# Supplementary material
Source: PubMed Central journal article supplement (PMC5566515)
Supplement: 10.1074_M117.780973_jbc.M117.780973-1.pdf [file 10.1074_M117.780973_jbc.M117.780973-1.pdf]

**Decreased miR26a/b and increased HuR expression post-transcriptionally  
upregulates ERBB2 to mediate acquired tamoxifen resistance in ER+  
breast cancer cells**

Sheng Tan, Keshuo Ding, Qing-Yun Chong, Junsong Zhao, Yuan Liu, Yunying Shao,  
Yuanyuan Zhang, Qing Yu, Zirui Xiong, Weijie Zhang , Min Zhang, Gaopeng Li<sup>1</sup>, Xiaoni Li,  
Xiangjun Kong, Akhlaq Ahmad, Zhengsheng Wu, Qiang Wu, Xiaodong Zhao, Peter E. Lobie  
and Tao Zhu

**List of materials included:** Supplementary Figures S1 and S2

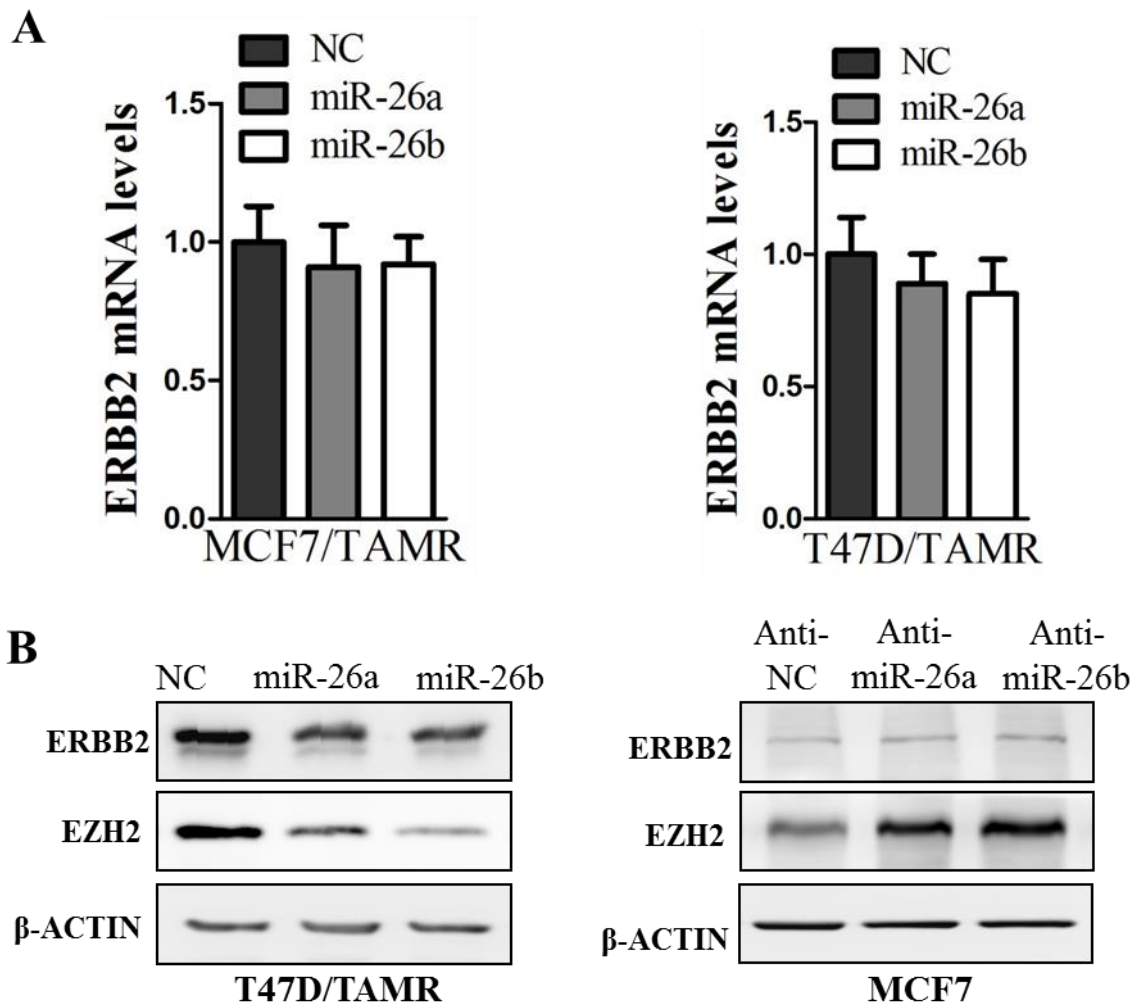

**Figure S1.** The effect of miR-26a/b on ERBB2 expression.

(A) MCF7 and T47D TAMR cells were transfected with scrambled oligo (NC) or miR-26a/b mimics. 48 hours after transfection, the *ERBB2* mRNA levels were determined by RT-qPCR with *GAPDH* as input control. (B) MCF7 cells were transfected with either anti-NC or anti-miR-26a/b in MCF7 cells. The ERBB2 and EZH2 protein levels were determined by western blot with  $\beta$ -ACTIN as input control.

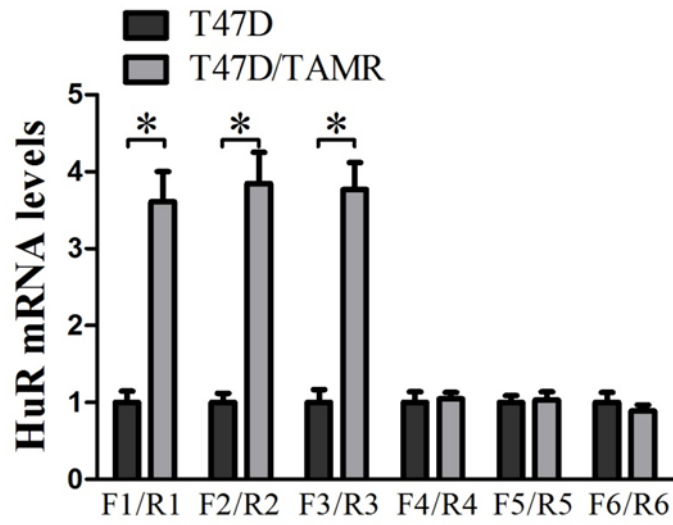

**Figure S2.** The 3'UTR of *HuR* transcripts were shortened via APA in T47D/TAMR cells.

The levels of *HuR* mRNA isoforms terminated at different PASs (amplified using the indicated primer pairs illustrated in Figure 7A) in T47D control and TAMR cells were assessed by RT-qPCR analysis.
